# Supplementary material for: Mechanochemical synthesis of mechanical bonds in M12L8 poly-[n]-catenanes
Source: Royal Society of Chemistry journal article supplement (doi:10.1039/d1dt03158a), 2021-11-23
Supplement: d1dt03158a1.pdf [file d1dt03158a1.pdf]

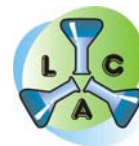

**POLITECNICO DI MILANO**

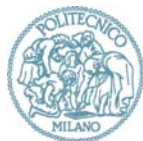

Rapporto n. 21.328

Milano, 03 Novembre 2021

Spett.le Politecnico di Milano  
Dipartimento CMIC  
Via Mancinelli 7  
20131 Milano

Att.ne Prof. Javier Marti Rujas

**Oggetto: Analisi CHN**

L'analisi è stata effettuata mediante un Analizzatore Elementare Costech ECS mod.4010 che permette la contemporanea determinazione di C, H, N. Il risultato (media aritmetica dei valori risultanti dall'analisi di 3 provini per ogni campione) è il seguente:

|            | N    |       | C     |       | H    |       |
|------------|------|-------|-------|-------|------|-------|
|            | w%   | dev%  | w%    | dev%  | w%   | dev%  |
| <b>N61</b> | 6.03 | ± 0.2 | 38.60 | ± 0.3 | 1.79 | ± 0.2 |

Richiesta d'analisi: Rich21.187  
Campioni ricevuti il: 03/11/2021  
Data inizio prove: 03/11/2021

RTP

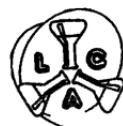

**Laboratorio Analisi Chimiche**  
Politecnico di Milano

I campioni di prova vengono conservati per tre mesi, quindi smaltiti.  
Il presente certificato non può essere riprodotto parzialmente senza autorizzazione scritta del laboratorio.  
I risultati delle prove si riferiscono al campione ricevuto, con l'eccezione del campione da cui proviene.

Dipartimento di Chimica, Materiali ed Ingegneria Chimica  
Via Mancinelli, 7 - 20131 Milano (Italy)  
Tel. +39 02 2399 3180 - Fax +39 02 2399 3180  
e-mail: lac@chem.polimi.it - web: http://lac.chem.polimi.it

RTL

Dott. Simone Gelosa
